# Supplementary material for: Six minute walk distance and reference values in healthy Italian children: A cross-sectional study
Source: PubMed Central journal article supplement (PMC6188863; doi:10.1371/journal.pone.0205792), 2018-10-15
Supplement: pone.0205792.s002.pdf [file pone.0205792.s002.pdf]

## Supporting information

**S2 Table.** Demographic data and 6-minute walk distance of female in different age groups.

| Age<br>(years) | n    | Height<br>(cm) | Weight<br>(kg) | BMI (Kg/m <sup>2</sup> ) | 6MWD<br>(m) |
|----------------|------|----------------|----------------|--------------------------|-------------|
| 6              | 340  | 116.3±4.8      | 22.0±3.7       | 16.2±2.1                 | 510.8±54.4  |
| 7              | 528  | 121.5±5.5      | 24.6±4.8       | 16.6±2.4                 | 544.2±60.4  |
| 8              | 539  | 127.0±5.6      | 27.5±5.7       | 17.0±2.8                 | 590.4±63.7  |
| 9              | 521  | 132.5±6.1      | 30.5±6.6       | 17.3±2.9                 | 612.4±62.3  |
| 10             | 592  | 139.8±6.8      | 36.1±7.9       | 18.4±3.1                 | 639.3±65.2  |
| 11             | 261  | 143.7±7.1      | 39.1±9.8       | 18.8±3.6                 | 651.4±68.1  |
| Total          | 2781 | 130.0±10.6     | 29.8±8.6       | 17.3±3.0                 | 592.1±77.6  |

Values are expressed by mean ± standard deviation.
