# Supplementary material for: Six minute walk distance and reference values in healthy Italian children: A cross-sectional study
Source: PubMed Central journal article supplement (PMC6188863; doi:10.1371/journal.pone.0205792), 2018-10-15
Supplement: pone.0205792.s003.pdf [file pone.0205792.s003.pdf]

## Supporting information

**S3 table.** Anthropometrics/demographic data and 6-minute walk distance in different height groups.

| Classes of height (cm) | n    | Age (years) | Height (cm) | Weight (kg) | BMI (Kg/m <sup>2</sup> ) | 6MWD (m)   |
|------------------------|------|-------------|-------------|-------------|--------------------------|------------|
| <114                   | 313  | 6.3±6.4     | 111.6±2.5   | 19.7±2.6    | 15.8±1.9                 | 513.9±63.0 |
| 114-124                | 1421 | 7.0±0.8     | 120.0±2.8   | 23.4±3.3    | 16.2±2.1                 | 546.1±69.8 |
| 124-134                | 1908 | 8.3±1.0     | 129.3±2.8   | 28.8±4.7    | 17.2±2.6                 | 599.6±69.6 |
| 134-144                | 1439 | 9.6±0.8     | 138.9±2.8   | 35.4±6.6    | 18.3±3.2                 | 635.6±71.0 |
| 144-155                | 490  | 10.2±0.5    | 148.0±2.5   | 43.2±8.0    | 19.7±3.5                 | 651.9±68.3 |
| >155                   | 43   | 10.5±0.3    | 158.2±3.4   | 52.8±9.8    | 21.1±3.7                 | 661.4±63.3 |

Values are expressed by mean ± standard deviation.
