# Supplementary material for: Six minute walk distance and reference values in healthy Italian children: A cross-sectional study
Source: PubMed Central journal article supplement (PMC6188863; doi:10.1371/journal.pone.0205792), 2018-10-15
Supplement: pone.0205792.s004.pdf [file pone.0205792.s004.pdf]

## Supporting information

**Table S4.** 6-minute walking distance norms for Italian children.

| Male             | 6 years   | 7 years   | 8 years   | 9 years   | 10 years  | 11 years  |
|------------------|-----------|-----------|-----------|-----------|-----------|-----------|
| Percentile       | (n = 350) | (n = 550) | (n = 577) | (n = 556) | (n = 551) | (n = 262) |
| 3 <sup>th</sup>  | 397.2     | 410       | 467.3     | 494.7     | 501.6     | 500.5     |
| 5 <sup>th</sup>  | 405.6     | 424       | 488       | 508.5     | 517.2     | 520       |
| 10 <sup>th</sup> | 436.1     | 455.1     | 515.4     | 533.4     | 538       | 540.6     |
| 20 <sup>th</sup> | 461.2     | 494       | 548       | 565       | 574       | 598.4     |
| 25 <sup>th</sup> | 470       | 505.8     | 559       | 582       | 587       | 615.8     |
| 30 <sup>th</sup> | 480       | 516.3     | 567       | 590.1     | 602.6     | 639.4     |
| 40 <sup>th</sup> | 497       | 534.4     | 583       | 608       | 626       | 653.2     |
| 50 <sup>th</sup> | 511       | 554       | 603       | 624       | 649       | 670.8     |
| 60 <sup>th</sup> | 526.6     | 570       | 619       | 643.2     | 670       | 686       |
| 70 <sup>th</sup> | 545       | 588       | 640       | 658.5     | 690       | 711       |
| 75 <sup>th</sup> | 558.3     | 600       | 650       | 665       | 700       | 718       |
| 80 <sup>th</sup> | 569.6     | 610       | 660       | 682       | 713.6     | 722.8     |
| 90 <sup>th</sup> | 601.8     | 635.8     | 688       | 710       | 739.8     | 747.1     |
| 95 <sup>th</sup> | 628       | 660       | 710       | 729.3     | 760       | 763.4     |
| 97 <sup>th</sup> | 659.5     | 676.5     | 728.6     | 744.6     | 768.9     | 777.1     |

  

| Female           | 6 years   | 7 years   | 8 years   | 9 years   | 10 years  | 11 years  |
|------------------|-----------|-----------|-----------|-----------|-----------|-----------|
| Percentile       | (n = 337) | (n = 526) | (n = 538) | (n = 521) | (n = 588) | (n = 258) |
| 3 <sup>th</sup>  | 416.3     | 426.2     | 463.3     | 485       | 516       | 520       |
| 5 <sup>th</sup>  | 422       | 440       | 483.9     | 504.2     | 531       | 529       |
| 10 <sup>th</sup> | 442.8     | 464       | 501.8     | 532.2     | 550       | 559.4     |
| 20 <sup>th</sup> | 460.6     | 497.4     | 535.8     | 560       | 581       | 583       |
| 25 <sup>th</sup> | 471       | 505       | 547.8     | 573.5     | 598       | 599       |
| 30 <sup>th</sup> | 480       | 512.1     | 556.4     | 582       | 605.7     | 616.7     |
| 40 <sup>th</sup> | 498       | 528.8     | 578       | 600       | 624.6     | 639.6     |

|                  |       |       |       |       |       |       |
|------------------|-------|-------|-------|-------|-------|-------|
| 50 <sup>th</sup> | 512   | 543   | 597   | 620   | 643   | 655   |
| 60 <sup>th</sup> | 524   | 560   | 611   | 630.2 | 660   | 676.4 |
| 70 <sup>th</sup> | 538.6 | 580   | 625   | 647.4 | 676.8 | 694   |
| 75 <sup>th</sup> | 545   | 587   | 635   | 656.5 | 686.8 | 705.3 |
| 80 <sup>th</sup> | 553.8 | 593.8 | 643   | 665.6 | 699.2 | 714.2 |
| 90 <sup>th</sup> | 578.2 | 622   | 670.1 | 692   | 720   | 732.1 |
| 95 <sup>th</sup> | 600   | 640   | 694   | 705   | 738.3 | 753.1 |
| 97 <sup>th</sup> | 613.6 | 648.2 | 700.8 | 716.7 | 750   | 760.5 |

---

Values are expressed in meters.
