# Supplementary material for: Six minute walk distance and reference values in healthy Italian children: A cross-sectional study
Source: PubMed Central journal article supplement (PMC6188863; doi:10.1371/journal.pone.0205792), 2018-10-15
Supplement: pone.0205792.s005.pdf [file pone.0205792.s005.pdf]

## Supporting information

**S5 Table.** Measured and predicted 6MWD of the present study and comparison with reported and predicted 6MWD

|                                      | Age        |            |            |            |            |            |
|--------------------------------------|------------|------------|------------|------------|------------|------------|
|                                      | 6          | 7          | 8          | 9          | 10         | 11         |
| <i>Measured 6MWD</i>                 |            |            |            |            |            |            |
| Present study.                       | 513.3±60.4 | 547.2±65.2 | 596.4±65.8 | 617.9±65.0 | 641.1±70.5 | 656.1±71.6 |
| Goemans et al.[17]                   | 516.1±61.8 | 559.2±65.4 | 604.3±72.0 | 595.7±69.0 | 633.1±70.0 | 625.9±83.0 |
| Saad H Bem et al.[14]                |            | 543.0±33.0 | 667.0±55.0 |            | 715.0±31.0 |            |
|                                      |            | (6-7 y)    | (8-9 y)    |            | (8-9 y)    |            |
| Geiger et al.[10]                    |            | 577.8±56.1 |            |            | 672.8±71.6 |            |
|                                      |            | (6-8 y)    |            |            | (10-11 y)  |            |
| Klepper et al. [15]                  |            |            | 534.5±60.3 | 515.8±81.4 | 497.9±74.0 | 534.9±88.9 |
|                                      |            |            | (7-8 y)    |            |            |            |
| Lammers et al.[16]                   | 463.0±40.0 | 488.0±35.0 | 483.0±40.0 | 496.0±53.0 | 506.0±45.0 | 512.0±41.0 |
| Ulrich et. al. (25)                  | 535.0±73.0 | 603.0±51.0 | 596.0±59.0 | 627.0±70.0 | 655.0±53.0 | 624.0±87.0 |
| De Assis Pereira Cacau<br>et al.(18) |            | 474.4±83.3 | 514.1±77.1 | 525.0±81.0 | 549.5±87.2 | 557.3±98.7 |
| Priesnitz et al.[22]                 | 508.3±54.0 | 550.2±61.6 | 556.7±67.2 | 594.2±60.6 | 602.4±61.1 | 608.0±54.3 |
| <i>Predicted 6MWD</i>                |            |            |            |            |            |            |
| Present study.                       | 510.4±13.1 | 550.5±17.0 | 590.5±15.7 | 620.6±15.1 | 643.8±15.3 | 654.5±15.4 |
| Geiger et al.[10]                    | 556.9±12.1 | 586.9±7.7  | 611.9±9.1  | 635.4±8.5  | 655.6±11.2 | 670.2±9.6  |
| Saad H Bem et al.(14)                | 595.9±21.1 | 624.3±17.2 | 652.7±18.3 | 677.0±18.2 | 703.4±25.4 | 718.8±23.0 |

In Lammers et al. and in our study, mean distances are reported for males and females together. In all other studies, all measured are reported for males.
